# Supplementary material for: Pressure-induced SERS enhancement in a MoS2/Au/R6G system by a two-step charge transfer process
Source: Royal Society of Chemistry journal article supplement (doi:10.1039/c9nr07098b), 2019-01-01
Supplement: c9nr07098b1.pdf [file c9nr07098b1.pdf]

## Electronic Supplementary Information (ESI)

### Pressure-induced SERS enhancement in MoS<sub>2</sub>/Au/R6G system by a two-step charge transfer process

Huanhuan Sun,<sup>a</sup> Mingguang Yao,<sup>\*a</sup> Yanping Song,<sup>a</sup> Luyao Zhu,<sup>a</sup> Jiajun Dong,<sup>a</sup> Ran Liu,<sup>a</sup> Peng Li,<sup>b</sup> Bing Zhao<sup>b</sup> and Bingbing Liu<sup>\*a</sup>

*<sup>a</sup>State Key Laboratory of Superhard Materials, College of Physics, Jilin University, No. 2699 Qianjin Street, Changchun 130012, China*

*E-mail: yaomg@jlu.edu.cn, liubb@jlu.edu.cn*

*<sup>b</sup>State Key Laboratory of Supramolecular Structure and Materials, Jilin University, No. 2699 Qianjin Street, Changchun 130012, China*

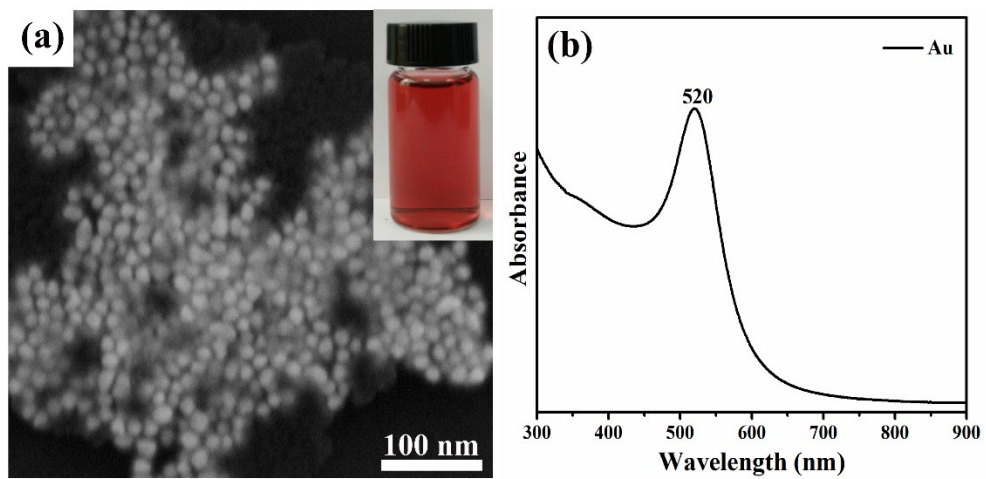

**Fig. S1** (a) SEM image of pure Au NPs. The inset shows the photo image of gold solution. (b) UV-Vis spectrum of Au colloid NPs.

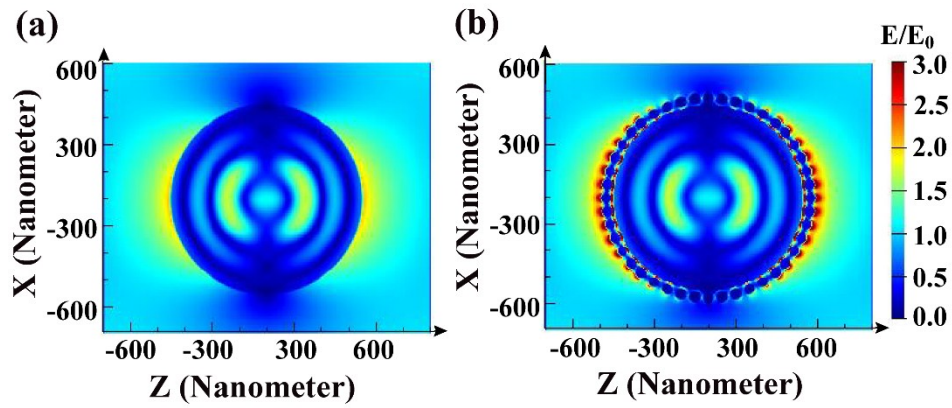

**Fig. S2** The electric field distributions of (a) MoS<sub>2</sub> and (b) MoS<sub>2</sub>/Au composite.

The electromagnetic field distribution based on numerically simulated method was performed using finite-difference time-domain (FDTD) Solutions. Fig. S2a shows the electric field distribution of single MoS<sub>2</sub> NFs, in which the size of MoS<sub>2</sub> NFs was set to 700 nm according to the SEM images. The X, Y and Z directions were enclosed by perfect match layers. As shown in Fig. S2b, the distance between Au NPs was set to 2 nm, and the incident electric field was polarized in-plane with a wavelength of 473 nm.

### Calculation of enhancement factor (EF)

The enhancement factor was estimated by the equation (2) in the manuscript. Take the R6G molecules adsorbed on MoS<sub>2</sub>/Au composite as an example, the Raman peak of the in-plane vibration mode (613 cm<sup>-1</sup>) in the Raman spectrum was selected to calculate EF values. The 613 cm<sup>-1</sup> Raman intensity of MoS<sub>2</sub>/Au composite is 11864.7 counts with 50 s acquisition time, and that of MoS<sub>2</sub> NFs is 447.5 counts with 160 s acquisition time. The Raman intensity ratio is estimated as below

$$\frac{I_{\text{SERS}}}{I_{\text{bulk}}} = \frac{11864.7}{447.5} \times \frac{160}{50} = 84.8$$

$$N_{\text{SERS}} = \frac{cVN_{\text{A}}A_{\text{Raman}}}{A_{\text{sub}}}$$

$$N_{\text{bulk}} = \frac{\rho hN_{\text{A}}A_{\text{Raman}}}{M}$$

$c$  is the molar concentration of the analyte molecules,  $V$  is the volume of the droplet,  $N_{\text{A}}$  is avogadro's constant ( $6.023 \times 10^{23}$ ),  $A_{\text{Raman}}$  is the area of laser spot (diameter in 1  $\mu\text{m}$ ),  $A_{\text{sub}}$  is the effective area of the substrates, 20  $\mu\text{L}$  of the droplet on the substrate was spread into a circle of about 3 mm in diameter to form the effective area of the substrate ( $A_{\text{Sub}}$ ).  $\rho$  is the density of R6G molecules ( $1.15 \text{ g}\cdot\text{cm}^{-3}$ ),  $h$  is the confocal depth of laser (23.64  $\mu\text{m}$ ),  $M$  is the molecular weight of R6G (479 g/mol).

Taking all the measurement parameters into consideration, the EF value can be estimated based on the following equations:

$$EF(\text{MoS}_2/\text{Au}) = \frac{I_{\text{SERS}}N_{\text{bulk}}}{I_{\text{bulk}}N_{\text{SERS}}} = \frac{84.8 \times 1.15 \times 23.64 \times 15^2 \times \pi}{10^{-3} \times 479 \times 20} = 1.69 \times 10^7$$

$$EF(\text{MoS}_2) = 2.05 \times 10^4$$

Therefore, we calculated the EF for R6G molecules on MoS<sub>2</sub>/Au and MoS<sub>2</sub> substrates to be  $1.69 \times 10^7$  and  $2.05 \times 10^4$ , respectively. By the similar method, the EFs for MB and CV dye molecules adsorbed on MoS<sub>2</sub>/Au substrate were calculated to be  $6.53 \times 10^7$  and  $2.13 \times 10^7$ , respectively.

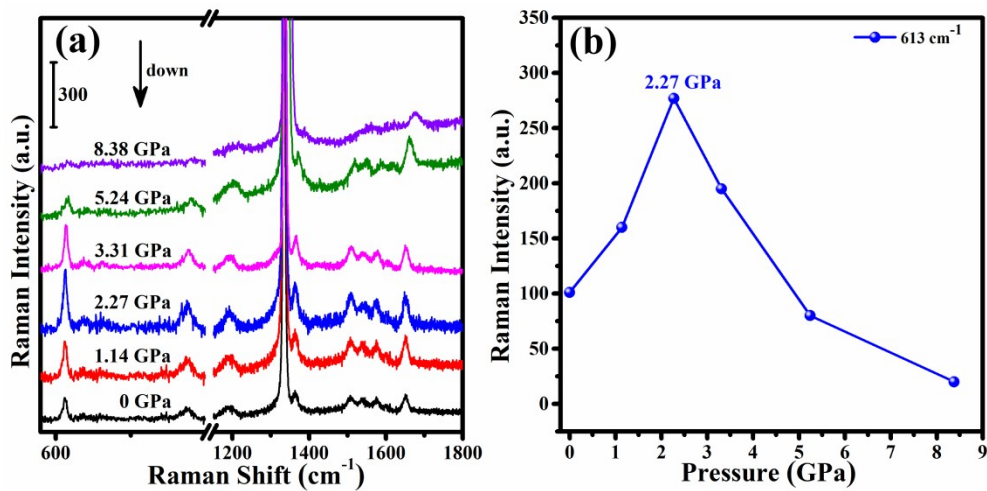

**Fig. S3** (a) PI-SERS spectra of R6G molecules adsorbed on MoS<sub>2</sub>/Au composite under releasing pressure. (b) The change trend of Raman intensity of R6G molecules as a function of pressure. The strongest Raman peak at ~1333 cm<sup>-1</sup> is originated from the diamond.

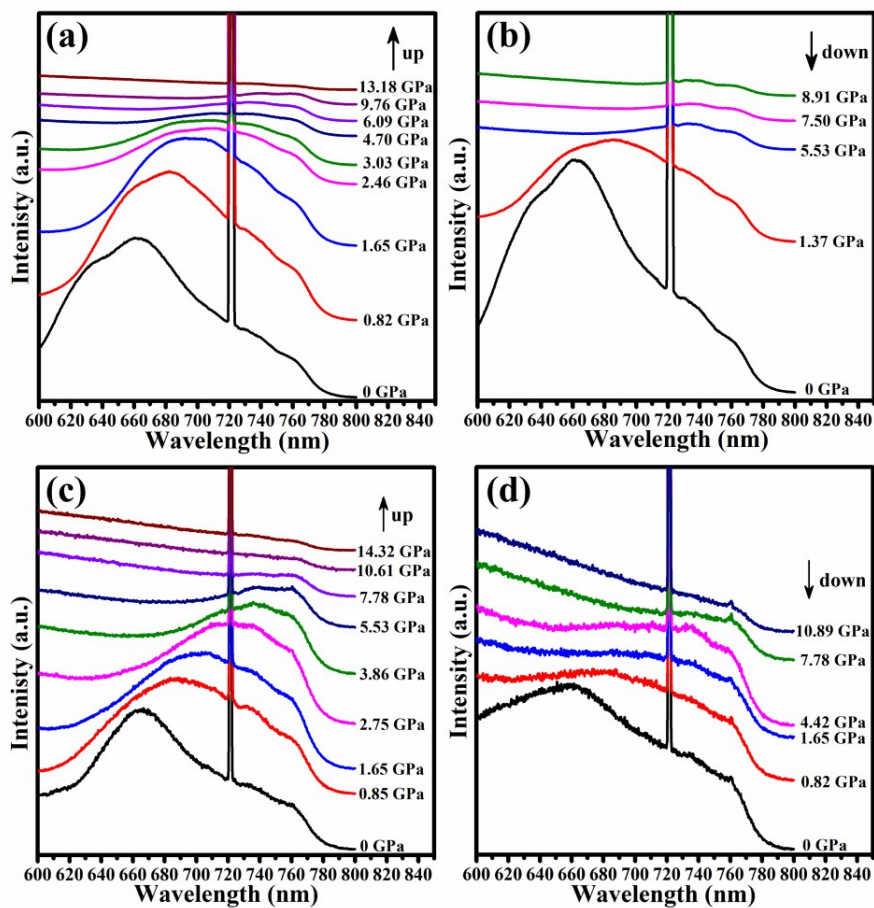

**Fig. S4** PL spectra of pure R6G molecules as a function of pressure along the compression (a) and decompression (b) path. PL spectra of R6G molecule ( $10^{-1}$  mol/L) adsorbed on MoS<sub>2</sub>/Au composite as a function of pressure along the compression (c) and decompression (d) path. The strongest PL band at  $\sim 720$  nm belongs to the frequency multiplier of 365 nm laser.

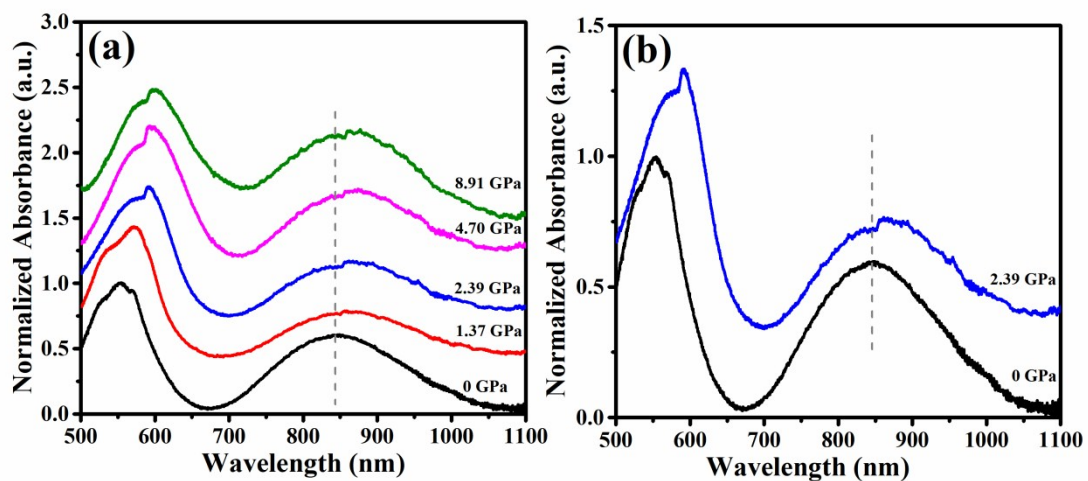

**Fig. S5** (a) the pressure-dependence UV-VIS spectra of the MoS<sub>2</sub>/Au/R6G system and (b) the UV-VIS spectra of the MoS<sub>2</sub>/Au/R6G system at ambient pressure and at 2.39 GPa.
